# Supplementary material
Source: publisher site journal article supplement (https://www.dovepress.com/article/572198)
Supplement: Supplementary file 1 [file 572198%20Revised%20Supplementary%20Tables%201-2.docx]

| Supplementary Table 1. Baseline Characteristics of the Participants | | | | |
| --- | --- | --- | --- | --- |
|  | Total | Metaverse | Standard | p-value |
| Age(years), mean± SD | 21.3±5 | 21.2±6 | 21.5±3 | 0.88 |
| Gender, n (%)  Male  Female | 14 (14.3)  84 (85.7) | 8 (57.1)  40 (47.6) | 6 (42.9)  44 (52.4) | 0.57 |

| Supplementary Table 2. Satisfaction with metaverse-based education | | | | |
| --- | --- | --- | --- | --- |
|  |  | Gender, n (%) | | p-value |
| All | Male | Female |  |
| Compared to the typical lectures, it is easier to follow the content of the metaverse lecture.  Strongly Disagree  Disagree  Neutral  Agree  Strongly Agree | 4  6  13  11  10 | 0 (0)  1 (16.7)  4 (30.8)  2 (18.2)  1 (10) | 4 (100)  5 (83.3)  9 (69.2)  9 (81.8)  9 (90) | 0.6 |
| Compared to the typical lectures, the content of the metaverse lecture is easy to understand.  Strongly Disagree  Disagree  Neutral  Agree  Strongly Agree | 3  5  15  12  9 | 0 (0)  1 (20)  5 (33.3)  1 (8.3)  1 (18.2) | 3 (100)  4 (80)  10 (66.7)  11 (91.7)  8 (88.9) | 0.4 |
| Compared to the typical lectures, the content of the metaverse lecture is more engaging.  Strongly Disagree  Disagree  Neutral  Agree  Strongly Agree | 4  2  11  14  13 | 0 (0)  1 (0)  2 (18.2)  3 (21.4)  2 (15.4) | 4 (100)  1 (100)  9 (81.8)  11 (78.6)  11 (84.6) | 0.7 |
| Compared to the typical lectures, the metaverse lecture is less stressful.  Strongly Disagree  Disagree  Neutral  Agree  Strongly Agree | 4  6  15  8  11 | 0 (0)  0 (0)  5 (33.3)  2 (25)  1 (9.1) | 4 (100)  6 (100)  10 (66.7)  6 (75)  10 (90.9) | 0.3 |
| The technicalities of joining the metaverse lecture are simple.  Strongly Disagree  Disagree  Neutral  Agree  Strongly Agree | 4  4  19  9  8 | 0 (0)  2 (50)  4 (21.1)  1 (11.1)  1 (12.5) | 4 (100)  2 (50)  15 (78.9)  8 (88.9)  7 (87.5) | 0.4 |
| If you have the option to choose the lecturing type in pharmacology, would you choose a metaverse based lecture?  No  Neutral  Yes | 19  17  8 | 2 (10.5)  4 (23.5)  2 (25) | 17 (89.5)  13 (76.5)  6 (75) | 0.5 |
